# Supplementary material for: Soybean–SCN Battle: Novel Insight into Soybean’s Defense Strategies against Heterodera glycines
Source: MDPI journal article supplement (doi:10.3390/ijms242216232), 2023-11-12
Supplement: s1 [file s1]

**Table S12.** Primer sequences of nematode 18S ribosomal gene

| Gene name | Primer sequences         |
|-----------|--------------------------|
| SCN-18S-R | ACACGTCGCCGGTACAAGAC     |
| SCN-18S-F | GCCATGCATGTGTAAGTTTAACCT |
