# Supplementary material for: Soybean–SCN Battle: Novel Insight into Soybean’s Defense Strategies against Heterodera glycines
Source: MDPI journal article supplement (doi:10.3390/ijms242216232), 2023-11-12
Supplement: s1 [file s1]

**Table S11.** Sets of primers and probes used for TaqMan assay to evaluate copy number variation (CNV) of *rhg1* and *Rhg4* genes

| Gene          | Primer sequences                             | Tm | Probe sequence         | Tm |
|---------------|----------------------------------------------|----|------------------------|----|
| <i>Rhg1</i>   | Fwd: GTTATTACTTCAATCGACGAGTGTGTTG            | 59 | FAM: TCGGACACCTCAAAACT | 68 |
|               | Rev: AAATATTTTCCAGTAAAATCAGATTAAAACTATACTTCA | 58 |                        |    |
| <i>Lectin</i> | Fwd: TCCCGAGTGGGTGAGGATAG                    | 58 | VIC: TGCTGCCACGGGAC    | 69 |
|               | Rev: CATGCGATTCCCCAGGTATG                    | 59 |                        |    |
| <i>Rhg4</i>   | Fwd: GCTTGCAGACTGCCTTTGTAAAA                 | 60 | FAM: CAACAACCTCGAAATTC | 60 |
|               | Rev: TTTATAATTGATTGCGCAATCATATTGCACGA        | 65 |                        |    |
