# Supplementary material for: Soybean–SCN Battle: Novel Insight into Soybean’s Defense Strategies against Heterodera glycines
Source: Int J Mol Sci. 2023 Nov 12;24(22):16232. doi: 10.3390/ijms242216232 (PMC10671692; doi:10.3390/ijms242216232)
Supplement: Supplementary file 1 [file ijms-24-16232-s001.zip]

Archive with 13 entries (13 files):
- Figure S1.pdf
- Tabel S1.xlsx
- Tabel S6.xlsx
- Table S10.xlsx
- Table S11.pdf
- Table S12.pdf
- Table S2.xls
- Table S3.xlsx
- Table S4.xlsx
- Table S5.xlsx
- Table S7.xlsx
- Table S8.xlsx
- Table S9.xlsx
