# Supplementary material for: Soybean–SCN Battle: Novel Insight into Soybean’s Defense Strategies against Heterodera glycines
Source: Int J Mol Sci. 2023 Nov 12;24(22):16232. doi: 10.3390/ijms242216232 (PMC10671692; doi:10.3390/ijms242216232)
Supplement: Supplementary file 1 [file ijms-24-16232-s001.zip › Tabel S1.xlsx]

## Sheet: GO-Biological Process-Clusters
Table S1-GO biological analyses of upregulated genes in PI 437654 at 5 dpi
Cell detoxification or response to stress				Cell death in response to reactive oxygen species (ROS)				Carbon fixation				Salicylic acid biosynthesis
Gene ID	PFAM Description	InterPro Description			PFAM Description	InterPro Description			PFAM Description	InterPro Description			PFAM Description	InterPro Description
GLYMA_03G096500	2OG-FeII_Oxy	Oxoglutarate/iron-dependent dioxygenase		GLYMA_03G096500	2OG-FeII_Oxy	Oxoglutarate/iron-dependent dioxygenase		GLYMA_01G010200	Phosphoribulokinase/uridine kinase	PRK		GLYMA_03G232400	Calmodulin_bind	CALMODULIN-BINDING PROTEIN60
GLYMA_07G124400	2OG-FeII_Oxy	Oxoglutarate/iron-dependent dioxygenase		GLYMA_07G124400	2OG-FeII_Oxy	Oxoglutarate/iron-dependent dioxygenase		GLYMA_09G210900	Phosphoribulokinase/uridine kinase	PRK		GLYMA_19G229400	Calmodulin_bind	CALMODULIN-BINDING PROTEIN60
GLYMA_08G169100	2OG-FeII_Oxy	Oxoglutarate/iron-dependent dioxygenase		GLYMA_03G242100	Copine	C2 domain		GLYMA_13G046200	Ribulose bisphosphate carboxylase small chain, domain	RuBisCO_small		GLYMA_19G229500	Calmodulin_bind	CALMODULIN-BINDING PROTEIN60
GLYMA_14G058700	2OG-FeII_Oxy	Oxoglutarate/iron-dependent dioxygenase		GLYMA_19G239500	Copine	C2 domain
GLYMA_08G010400	Auxin_inducible	Small auxin-up RNA
GLYMA_03G242100	Copine	C2 domain
GLYMA_19G239500	Copine	C2 domain
GLYMA_16G214800	EF-hand_7	Toll/interleukin-1 receptor homology (TIR) domain
GLYMA_19G160100	EF-hand_7	EF-hand domain
GLYMA_01G124500	Ferritin	Ferritin/DPS protein domain
GLYMA_12G053900	Glyco_hydro_1	Glycoside hydrolase, family 1
GLYMA_12G062000	GRAS	Transcription factor GRAS
GLYMA_02G085600	HSP70	Heat shock protein 70 family
GLYMA_18G141900	MFS_1	Major facilitator superfamily domain
GLYMA_10G212300	Mlo	Mlo-related protein
GLYMA_02G184300	NB-ARC	Leucine-rich repeat
GLYMA_13G006700	NUDIX	NUDIX hydrolase domain
GLYMA_14G004300	NUDIX	NUDIX hydrolase domain
GLYMA_20G062000	NUDIX	NUDIX hydrolase domain
GLYMA_04G035600	p450	Cytochrome P450
GLYMA_19G194300	PBP	Phosphatidylethanolamine-binding protein PEBP
GLYMA_01G130500	peroxidase	Haem peroxidase, Plant ascorbate peroxidase
GLYMA_19G011800	peroxidase	peroxidase
GLYMA_03G038300	peroxidase	Haem peroxidase
GLYMA_03G038600	peroxidase	Haem peroxidase, plant/fungal/bacterial
GLYMA_09G023000	peroxidase	Haem peroxidase, Plant ascorbate peroxidase
GLYMA_09G057100	peroxidase	Haem peroxidase, Plant ascorbate peroxidase
GLYMA_15G052700	peroxidase	Haem peroxidase, plant/fungal/bacterial
GLYMA_20G001400	peroxidase	Haem peroxidase, plant/fungal/bacterial
GLYMA_07G184000	Pkinase	Protein kinase domain
GLYMA_17G173000	Pkinase	Protein kinase domain
GLYMA_18G219600	Pkinase_Tyr/ DUF26	Protein kinase domain
GLYMA_10G008500	Response_reg	Signal transduction response regulator, receiver domain
GLYMA_20G087000	Response_reg	GAF domain
GLYMA_06G248700	TIR_2	Toll/interleukin-1 receptor homology (TIR) domain
GLYMA_16G137300	TIR_2	Toll/interleukin-1 receptor homology (TIR) domain
GLYMA_19G214600	zf-C2H2_6	Zinc finger, C2H2
