# Supplementary material for: Soybean–SCN Battle: Novel Insight into Soybean’s Defense Strategies against Heterodera glycines
Source: Int J Mol Sci. 2023 Nov 12;24(22):16232. doi: 10.3390/ijms242216232 (PMC10671692; doi:10.3390/ijms242216232)
Supplement: Supplementary file 1 [file ijms-24-16232-s001.zip › Tabel S6.xlsx]

## Sheet: Sheet1
Table S6- GO enrichment analysis unique DEGs in PI 437654 at 10 dpi
Ammonium transmembrane transport					Sulfur amino acid biosynthetic process
Genes	PFAM Description	InterPro Description			Genes	PFAM Description	InterPro Description
GLYMA_10G168100	Ammonium_transp	Ammonium transporter			GLYMA_20G148100	PALP	Tryptophan synthase beta subunit-like PLP-dependent enzyme
GLYMA_07G153800	Ammonium_transp	Ammonium transporter			GLYMA_14G014700	Hexapep	Hexapeptide repeat
