# Supplementary material for: Soybean–SCN Battle: Novel Insight into Soybean’s Defense Strategies against Heterodera glycines
Source: Int J Mol Sci. 2023 Nov 12;24(22):16232. doi: 10.3390/ijms242216232 (PMC10671692; doi:10.3390/ijms242216232)
Supplement: Supplementary file 1 [file ijms-24-16232-s001.zip › Table S2.xls]

## Sheet: PI437654-10dpi-GO-Biological P.
Table S2-GO biological analyses of upregulated genes in PI 437654 at 10 dpi
detoxification or response to stress						Sulfur and glycosyl metabolic process					Salicylic acid biosynthesis
Gene Name	PFAM Description	GO Description	InterPro Description			Gene Name	PFAM Description	GO Description	InterPro Description		Gene Name	PFAM Description	GO Description	InterPro Description
Glyma.01G108200	Cu-oxidase_2	oxidoreductase activity	Cupredoxin/ Laccase			Glyma.01G108200	Cu-oxidase	oxidoreductase activity/lignin catabolic process	Cupredoxin/ Laccase		Glyma.03G147700	Dirigent		Plant disease resistance response protein
Glyma.01G211800	NmrA	binding	NmrA-like domain/ NAD(P)-binding domain			Glyma.01G135200	p450	oxidoreductase activity	Cytochrome P450		Glyma.05G237200	Calmodulin_bind	calmodulin binding	CALMODULIN-BINDING PROTEIN60
Glyma.02G029400		nucleic acid binding	Zinc finger, C2H2			Glyma.05G161300	GST_C	protein binding	Glutathione S-transferase, N-terminal		Glyma.07G093900	Calmodulin_bind	calmodulin binding	CALMODULIN-BINDING PROTEIN60
Glyma.02G124900	2OG-FeII_Oxy	oxidoreductase activity	Oxoglutarate/iron-dependent dioxygenase			Glyma.06G084200	PNP_UDP_1	catalytic activity	Nucleoside phosphorylase domain		Glyma.09G182400	Calmodulin_bind	calmodulin binding	CALMODULIN-BINDING PROTEIN60
Glyma.02G156100	p450	oxidoreductase activity	Cytochrome P450			Glyma.08G118700	GST_N	protein binding	Glutathione S-transferase, Thioredoxin-like fold		Glyma.19G151200	Dirigent		Plant disease resistance response protein
Glyma.02G233800	peroxidase	peroxidase activity	Plant peroxidase			Glyma.08G174900	GST_N	protein binding	Glutathione S-transferase, Thioredoxin-like fold		Glyma.19G229500	Calmodulin_bind	calmodulin binding	CALMODULIN-BINDING PROTEIN60
Glyma.03G038600	peroxidase	peroxidase activity	Plant peroxidase			Glyma.08G277000	Transketolase_C	catalytic activity	Transketolase-like, pyrimidine-binding domain		Glyma.19G263300	Lipoxygenase	oxidoreductase activity/ linoleate 13S-lipoxygenase activity	Lipoxygenase
Glyma.03G038700	peroxidase	peroxidase activity	Plant peroxidase			Glyma.09G049200	p450	oxidoreductase activity	Cytochrome P450
Glyma.03G143700	p450	oxidoreductase activity	Cytochrome P450			Glyma.10G251500	Thi4	thiamine biosynthetic process	Thiazole biosynthetic enzyme Thi4 family
Glyma.03G147700	Dirigent		Plant disease resistance response protein			Glyma.11G129300	Glyco_hydro_1	catalytic activity	Glycoside hydrolase, family 1
Glyma.04G227900	2OG-FeII_Oxy	oxidoreductase activity	Oxoglutarate/iron-dependent dioxygenase			Glyma.12G054200	Glyco_hydro_1	catalytic activity	Glycoside hydrolase, family 1
Glyma.05G022100	p450	oxidoreductase activity	Cytochrome P450			Glyma.14G014700	Hexapep	transferase activity	Hexapeptide repeat
Glyma.05G204600	Thaumatin		Thaumatin			Glyma.15G156100	p450	oxidoreductase activity	Cytochrome P450
Glyma.06G137000	2OG-FeII_Oxy	oxidoreductase activity	Oxoglutarate/iron-dependent dioxygenase			Glyma.20G148100	PALP	catalytic activity	Cysteine synthase/ Tryptophan synthase
Glyma.06G145300	peroxidase	peroxidase activity	Plant peroxidase
Glyma.06G317800	DER1		Derlin
Glyma.08G050400	2OG-FeII_Oxy	oxidoreductase activity	Oxoglutarate/iron-dependent dioxygenase
Glyma.09G049200	p450	oxidoreductase activity	Cytochrome P450
Glyma.09G277900	peroxidase	peroxidase activity	Plant peroxidase
Glyma.10G114600	p450	oxidoreductase activity	Cytochrome P450
Glyma.11G062500	p450	oxidoreductase activity	Cytochrome P450
Glyma.11G062600	p450	oxidoreductase activity	Cytochrome P450
Glyma.11G062700	p450	oxidoreductase activity	Cytochrome P450
Glyma.11G070500	NmrA	binding	NmrA-like domain
Glyma.11G070600	NmrA	binding
Glyma.11G129300	Glyco_hydro_1	catalytic activity	Glycoside hydrolase, family 1
Glyma.11G161600	peroxidase	peroxidase activity	Plant peroxidase
Glyma.11G162100	peroxidase	peroxidase activity	Plant peroxidase
Glyma.12G015300	ADH_zinc_N	oxidoreductase activity	Alcohol dehydrogenase superfamily, zinc-type
Glyma.12G054200	Glyco_hydro_1	catalytic activity	Glycoside hydrolase, family 1
Glyma.13G113100	Pyr_redox_3	oxidation-reduction process/ NADP binding	Dimethylaniline monooxygenase, N-oxide-forming
Glyma.13G180200	HSF_DNA-bind	transcription factor activity, sequence-specific DNA binding	Heat shock factor (HSF)-type, DNA-binding
Glyma.13G346700	Glyco_hydro_19/ Chitin_bind_1	chitinase activity	Chitin-binding, type 1/ Glycoside hydrolase
Glyma.15G156100	p450	oxidoreductase activity	Cytochrome P450
Glyma.16G017500	2OG-FeII_Oxy	oxidoreductase activity	Oxoglutarate/iron-dependent dioxygenase
Glyma.16G135200	NB-ARC/ TIR_2	innate immune response/ transmembrane signaling receptor activity/ defense response/ apoptotic process	NB-ARC, Toll/interleukin-1 receptor homology (TIR) domain
Glyma.16G195600	p450	oxidoreductase activity	Cytochrome P450
Glyma.17G030100	Bet_v_1	defense response	Bet v I/Major latex protein
Glyma.17G030300	Bet_v_1	defense response	Bet v I/Major latex protein
Glyma.17G030400	Bet_v_1	defense response	Bet v I/Major latex protein
Glyma.17G046500	Redoxin	oxidoreductase activity/ antioxidant activity/ cell redox homeostasis	Thioredoxin-like fold
Glyma.17G046600	Pyr_redox_3	NADP binding/ oxidation-reduction process	Flavin monooxygenase FMO
Glyma.17G224300	Pkinase/ Lectin_legB	protein kinase activity	Protein kinase domain
Glyma.18G211000	peroxidase	peroxidase activity	Plant peroxidase
Glyma.18G273200	2OG-FeII_Oxy	oxidoreductase activity	Oxoglutarate/iron-dependent dioxygenase
Glyma.19G083900	Aa_trans	amino acid transmembrane transport	Amino acid transporter, transmembrane domain
Glyma.19G263300	Lipoxygenase	oxidoreductase activity	Lipoxygenase
Glyma.20G169200	peroxidase	peroxidase activity	Plant peroxidase
