# Supplementary material for: Soybean–SCN Battle: Novel Insight into Soybean’s Defense Strategies against Heterodera glycines
Source: Int J Mol Sci. 2023 Nov 12;24(22):16232. doi: 10.3390/ijms242216232 (PMC10671692; doi:10.3390/ijms242216232)
Supplement: Supplementary file 1 [file ijms-24-16232-s001.zip › Table S3.xlsx]

## Sheet: Sheet1
Table S3- Go term categories of genes that uniquely upregulated in PI 437654 at 5 dpi
Response to chemical				Negative regulation of development and reproductive process				Photosynthesis and carbon fixation				Salicylic acid metabolic process				Oxazole or thiazole metabolic process				Fructose1,6 bisphosphate metabolic process
Gene ID	PFAM Description	InterPro Description		Gene ID	PFAM Description	InterPro Description		Gene Name	PFAM Description	InterPro Description		Gene Name	PFAM Description	InterPro Description		Gene Name	PFAM Description	InterPro Description		Gene Name	PFAM Description	InterPro Description
Glyma.02G085600	HSP70	Heat shock protein 70 family		Glyma.03G194700	PBP	Phosphatidylethanolamine-binding protein PEBP		Glyma.01G010200	PRK	Phosphoribulokinase		Glyma.03G232400	Calmodulin_bind	CALMODULIN-BINDING PROTEIN60		Glyma.10G251500	Thi4	Thiazole biosynthetic enzyme Thi4 family		Glyma.11G111400	Glycolytic	Fructose-bisphosphate aldolase, class-I
Glyma.03G242100	Copine	Copine		Glyma.19G194300	PBP	Phosphatidylethanolamine-binding protein PEBP		Glyma.09G087700	PSI_PSAK	Photosystem I PsaG/PsaK protein		Glyma.08G324300	GDPD	Glycerophosphoryl diester phosphodiesterase						Glyma.12G037400	Glycolytic	Fructose-bisphosphate aldolase, class-I
Glyma.08G010400	Auxin_inducible	Small auxin-up RNA						Glyma.09G210900	PRK	Phosphoribulokinase		Glyma.12G009200	Methyltransf_11	SAM-dependent methyltransferase SMT-type
Glyma.12G062000	GRAS	Transcription factor GRAS						Glyma.13G046200	RbcS	Ribulose bisphosphate carboxylase small chain, domain		Glyma.19G229400	Calmodulin_bind	CALMODULIN-BINDING PROTEIN60
Glyma.15G052700	peroxidase	Plant peroxidase						Glyma.15G250800	FMN_dh	FMN-dependent dehydrogenase
Glyma.18G141900	MFS_1	Major facilitator superfamily domain						Glyma.16G165500	Chloroa_b-bind	Chlorophyll A-B binding protein, plant
Glyma.19G194300	PBP	Phosphatidylethanolamine-binding protein PEBP
Glyma.19G214600	zf-C2H2_6	Zinc finger, C2H2
