# Supplementary material for: Soybean–SCN Battle: Novel Insight into Soybean’s Defense Strategies against Heterodera glycines
Source: Int J Mol Sci. 2023 Nov 12;24(22):16232. doi: 10.3390/ijms242216232 (PMC10671692; doi:10.3390/ijms242216232)
Supplement: Supplementary file 1 [file ijms-24-16232-s001.zip › Table S4.xlsx]

## Sheet: Sheet1
Table S4- GO term categories of genes that identified in PI 437654 and PI 548402 at 5dpi
Response to chemical and oxidative stress			programmed cell death in response to reactive oxygen species (ROS)			Cellular response to inorganic substance			Response to ethylene
Gene ID	Functional Categories		Gene ID	Functional Categories		Gene ID	Functional Categories		Gene ID	Functional Categories
GLYMA_03G096500	2OG-Fe(II) oxygenase superfamily		GLYMA_14G058700	2OG-Fe(II) oxygenase superfamily		GLYMA_08G169100	2OG-Fe(II) oxygenase superfamily		GLYMA_08G169100	2OG-Fe(II) oxygenase superfamily
GLYMA_07G124400	2OG-Fe(II) oxygenase superfamily		GLYMA_03G096500	2OG-Fe(II) oxygenase superfamily		GLYMA_19G239500	C2 domain/Copine		GLYMA_19G239500	C2 domain/Copine
GLYMA_08G169100	2OG-Fe(II) oxygenase superfamily		GLYMA_07G124400	2OG-Fe(II) oxygenase superfamily					GLYMA_20G087000	ethylene receptor
GLYMA_14G058700	2OG-Fe(II) oxygenase superfamily		GLYMA_08G169100	2OG-Fe(II) oxygenase superfamily
GLYMA_19G239500	C2 domain/Copine		GLYMA_19G239500	C2 domain/Copine
GLYMA_04G035600	Cytochrome P450		GLYMA_04G035600	Cytochrome P450
GLYMA_09G144300	Cytochrome P450		GLYMA_20G087000	ethylene receptor
GLYMA_17G054600	Cytokinin dehydrogenase 1, FAD and cytokinin binding		GLYMA_03G038300	Peroxidase
GLYMA_20G087000	ethylene receptor		GLYMA_19G011800	Peroxidase/oxygenase
GLYMA_15G134200	FAD binding domain/ Berberine and berberine like
GLYMA_15G134300	FAD binding domain/ Berberine and berberine like
GLYMA_14G004300	NUDIX domain
GLYMA_03G038300	Peroxidase
GLYMA_19G011800	Peroxidase/oxygenase
GLYMA_10G008500	Response regulator receiver domain
GLYMA_06G248700	TIR domain
