# Supplementary material for: Soybean–SCN Battle: Novel Insight into Soybean’s Defense Strategies against Heterodera glycines
Source: Int J Mol Sci. 2023 Nov 12;24(22):16232. doi: 10.3390/ijms242216232 (PMC10671692; doi:10.3390/ijms242216232)
Supplement: Supplementary file 1 [file ijms-24-16232-s001.zip › Table S5.xlsx]

## Sheet: Sheet2
Table S5- GO enrichment analyses of SCN-responsive genes overlapped in PI 437654, PI 548402 and PI 88788 at 5 dpi
Response to stress & Cellular detoxification				Regulation of primary metabolic process such as RNA, DNA & etc.
Gene Name	PFAM Description	InterPro Description		Gene Name	PFAM Description	InterPro Description
Glyma.12G053900	Glyco_hydro_1	Glycoside hydrolase, family 1		Glyma.03G162400	AP2	AP2/ERF domain
Glyma.02G184300	LRR_8	Leucine-rich repeat		Glyma.03G162700	AP2	AP2/ERF domain
Glyma.01G130500	peroxidase	Plant ascorbate peroxidase		Glyma.05G186700	AP2	AP2/ERF domain
Glyma.03G038500	peroxidase	Plant ascorbate peroxidase		Glyma.08G018300	WRKY	WRKY domain
Glyma.09G023000	peroxidase	Plant ascorbate peroxidase		Glyma.10G186800	AP2	AP2/ERF domain
Glyma.09G057100	peroxidase	Plant peroxidase		Glyma.13G122500	AP2	AP2/ERF domain
Glyma.20G001400	peroxidase	Plant peroxidase		Glyma.13G123100	AP2	AP2/ERF domain
Glyma.07G184000	Pkinase	Protein kinase domain		Glyma.17G173000	Pkinase	Protein kinase domain
Glyma.17G173000	Pkinase	Protein kinase domain		Glyma.19G163700	AP2	AP2/ERF domain
Glyma.20G036100	Ribonuclease_T2	Ribonuclease T2-like		Glyma.19G163900	AP2	AP2/ERF domain
				Glyma.19G229500	Calmodulin_bind	CALMODULIN-BINDING PROTEIN60

## Sheet: Sheet1
GLYMA_01G130500				GLYMA_01G130500
GLYMA_03G038500				GLYMA_02G184300
GLYMA_09G023000				GLYMA_03G038500
GLYMA_09G057100				GLYMA_07G184000
GLYMA_12G053900				GLYMA_09G023000
GLYMA_20G001400				GLYMA_09G057100
GLYMA_20G036100				GLYMA_12G053900
				GLYMA_17G173000
				GLYMA_20G001400
				GLYMA_20G036100

## Sheet: Sheet3
Glyma.03G162400
Glyma.17G173000
Glyma.03G162700
Glyma.05G186700
Glyma.08G018300
Glyma.10G186800
Glyma.13G122500
Glyma.13G123100
Glyma.19G163700
Glyma.19G163900
Glyma.19G229500
Glyma.03G162400
Glyma.03G162700
Glyma.05G186700
Glyma.08G018300
Glyma.10G186800
Glyma.13G122500
Glyma.13G123100
Glyma.19G163700
Glyma.19G163900
Glyma.19G229500
