# Supplementary material for: Soybean–SCN Battle: Novel Insight into Soybean’s Defense Strategies against Heterodera glycines
Source: Int J Mol Sci. 2023 Nov 12;24(22):16232. doi: 10.3390/ijms242216232 (PMC10671692; doi:10.3390/ijms242216232)
Supplement: Supplementary file 1 [file ijms-24-16232-s001.zip › Table S7.xlsx]

## Sheet: Sheet1
Table S7- Go enrichment analysis of DEGs that overlapped in PI 437654 and PI 548402
Oxazole or thiazole biosynthetic process				S-glycoside catabolic process				Sulfur compound metabolic process
Gene ID	PFAM description	InterPro Description		Gene ID	PFAM description	InterPro Description		Gene ID	PFAM description	InterPro Description
Glyma.10G251500	Thi4	Thiazole biosynthetic enzyme Thi4 family		Glyma.11G129300	Glyco_hydro_1	Glycoside hydrolase, family 1		Glyma.11G129300	Glyco_hydro_1	Glycoside hydrolase, family 1
								Glyma.10G251500	Thi4	Thiazole biosynthetic enzyme Thi4 family
