# Supplementary material for: Soybean–SCN Battle: Novel Insight into Soybean’s Defense Strategies against Heterodera glycines
Source: Int J Mol Sci. 2023 Nov 12;24(22):16232. doi: 10.3390/ijms242216232 (PMC10671692; doi:10.3390/ijms242216232)
Supplement: Supplementary file 1 [file ijms-24-16232-s001.zip › Table S8.xlsx]

## Sheet: Sheet1
Table S8- GO enrichment analysis of SCN-responsive genes that overlapped in PI437654 and PI88788 at 10 dpi
Salicylic acid biosynthetic process				Monocarboxylic acid biosynthetic process				Cellular oxidant detoxification				Organic acid metabolic process					Regulation of nucleic acid-templated transcription				Response to stress
Gene ID	PFAM Description	InterPro Description		Gene ID	PFAM Description	InterPro Description		Gene ID	PFAM Description	InterPro Description		Gene ID	PFAM Description	InterPro Description			Gene ID	PFAM Description	InterPro Description		Gene ID	PFAM Description	InterPro Description
GLYMA_05G237200	Calmodulin_bind	CALMODULIN-BINDING PROTEIN60		GLYMA_05G237200	Calmodulin_bind	CALMODULIN-BINDING PROTEIN60		GLYMA_09G277900	peroxidase	Haem peroxidase, plant/fungal/bacterial		GLYMA_05G237200	Calmodulin_bind	CALMODULIN-BINDING PROTEIN60			GLYMA_13G180200	HSF_DNA-bind	Heat shock factor (HSF)-type, DNA-binding		GLYMA_05G204600	Thaumatin	Thaumatin
GLYMA_07G093900	Calmodulin_bind	CALMODULIN-BINDING PROTEIN60		GLYMA_07G093900	Calmodulin_bind	CALMODULIN-BINDING PROTEIN60		GLYMA_17G046500	Redoxin	Thioredoxin-like fold		GLYMA_07G093900	Calmodulin_bind	CALMODULIN-BINDING PROTEIN60			GLYMA_04G223300	WRKY	WRKY domain		GLYMA_13G180200	HSF_DNA-bind	Heat shock factor (HSF)-type, DNA-binding
GLYMA_19G229500	Calmodulin_bind	CALMODULIN-BINDING PROTEIN60		GLYMA_19G229500	Calmodulin_bind	CALMODULIN-BINDING PROTEIN60		GLYMA_20G169200	peroxidase	Haem peroxidase, plant/fungal/bacterial		GLYMA_19G229500	Calmodulin_bind	CALMODULIN-BINDING PROTEIN60			GLYMA_05G237200	Calmodulin_bind	CALMODULIN-BINDING PROTEIN60		GLYMA_17G046500	Redoxin	Thioredoxin-like fold
				GLYMA_19G151200	Dirigent	Plant disease resistance response protein						GLYMA_19G151200	Dirigent	Plant disease resistance response protein			GLYMA_07G093900	Calmodulin_bind	CALMODULIN-BINDING PROTEIN60		GLYMA_17G224300	Pkinase	Protein kinase domain
				GLYMA_19G263300	Lipoxygenase	Lipoxygenase						GLYMA_19G263300	Lipoxygenase	Lipoxygenase			GLYMA_13G267600	WRKY	WRKY domain		GLYMA_09G277900	peroxidase	Haem peroxidase, plant/fungal/bacterial
																	GLYMA_17G222300	WRKY	WRKY domain		GLYMA_20G169200	peroxidase	Haem peroxidase, plant/fungal/bacterial
																	GLYMA_19G229500	Calmodulin_bind	CALMODULIN-BINDING PROTEIN60
