# Supplementary material for: Soybean–SCN Battle: Novel Insight into Soybean’s Defense Strategies against Heterodera glycines
Source: Int J Mol Sci. 2023 Nov 12;24(22):16232. doi: 10.3390/ijms242216232 (PMC10671692; doi:10.3390/ijms242216232)
Supplement: Supplementary file 1 [file ijms-24-16232-s001.zip › Table S9.xlsx]

## Sheet: Sheet1
Table S9- The pathways analyses of DEGs in PI 437654, PI 548402, and PI 88788 at 5dpi
	PI 437654
	Enrichment FDR	nGenes	Pathway Genes	Fold Enrichment	Pathway	Genes
	1.39823e-07	10	255	13.2051	Phenylpropanoid biosynthesis	GLYMA_07G124400 GLYMA_03G096500 GLYMA_01G169200 GLYMA_20G001400 GLYMA_12G053900 GLYMA_03G038500 GLYMA_03G038600 GLYMA_09G057100 GLYMA_01G130500 GLYMA_15G052700
	0.000722963	6	224	9.01952	MAPK signaling pathway	GLYMA_03G162700 GLYMA_13G123100 GLYMA_19G160100 GLYMA_19G164100 GLYMA_10G186800 GLYMA_08G018300
	0.000757951	4	79	17.0496	Carbon fixation in photosynthetic organisms	GLYMA_13G046200 GLYMA_01G010200 GLYMA_09G210900 GLYMA_11G111400
	0.00161135	15	1764	2.86334	Biosynthesis of secondary metabolites	GLYMA_15G250800 GLYMA_13G046200 GLYMA_07G124400 GLYMA_03G096500 GLYMA_01G169200 GLYMA_20G001400 GLYMA_12G053900 GLYMA_03G038500 GLYMA_09G122500 GLYMA_03G038600 GLYMA_09G057100 GLYMA_01G130500 GLYMA_12G009200 GLYMA_11G111400 GLYMA_15G052700
	0.00822145	5	286	5.88687	Plant-pathogen interaction	GLYMA_06G034700 GLYMA_16G059300 GLYMA_19G088200 GLYMA_19G160100 GLYMA_08G018300
	0.0181041	5	359	4.68982	Carbon metabolism	GLYMA_15G250800 GLYMA_13G046200 GLYMA_01G010200 GLYMA_09G210900 GLYMA_11G111400
	0.0356755	5	440	3.82646	Plant hormone signal transduction	GLYMA_03G162700 GLYMA_13G123100 GLYMA_19G164100 GLYMA_10G186800 GLYMA_08G010400
	PI 548402
	Enrichment FDR	nGenes	Pathway Genes	Fold Enrichment	Pathway	Genes
	3.18926e-10	33	224	4.1993	MAPK signaling pathway	GLYMA_01G128100 GLYMA_09G255000 GLYMA_18G238100 GLYMA_03G162700 GLYMA_10G036700 GLYMA_13G123100 GLYMA_10G007000 GLYMA_13G166200 GLYMA_20G202200 GLYMA_01G124700 GLYMA_15G172600 GLYMA_20G203700 GLYMA_18G260700 GLYMA_09G236800 GLYMA_04G147000 GLYMA_12G241700 GLYMA_02G261900 GLYMA_19G164100 GLYMA_10G186800 GLYMA_05G119600 GLYMA_15G062400 GLYMA_04G066900 GLYMA_15G062500 GLYMA_08G133600 GLYMA_11G233300…
	9.21445e-08	31	255	3.46523	Phenylpropanoid biosynthesis	GLYMA_05G147000 GLYMA_07G124400 GLYMA_20G169200 GLYMA_02G233800 GLYMA_03G096500 GLYMA_11G129900 GLYMA_11G064400 GLYMA_06G302700 GLYMA_13G106400 GLYMA_18G104100 GLYMA_19G091800 GLYMA_20G001400 GLYMA_12G053900 GLYMA_09G284700 GLYMA_12G054200 GLYMA_03G038500 GLYMA_20G240600 GLYMA_03G038600 GLYMA_03G038700 GLYMA_02G135100 GLYMA_02G135200 GLYMA_09G057100 GLYMA_16G055900 GLYMA_09G022800 GLYMA_01G130500…
	1.17495e-05	38	440	2.46174	Plant hormone signal transduction	GLYMA_12G033900 GLYMA_19G195200 GLYMA_18G300900 GLYMA_03G256200 GLYMA_03G162700 GLYMA_10G036700 GLYMA_13G123100 GLYMA_10G007000 GLYMA_13G166200 GLYMA_20G202200 GLYMA_01G124700 GLYMA_20G203700 GLYMA_04G147000 GLYMA_12G241700 GLYMA_03G029600 GLYMA_07G051700 GLYMA_02G097900 GLYMA_08G201100 GLYMA_02G261900 GLYMA_19G145300 GLYMA_10G092100 GLYMA_13G354700 GLYMA_06G260800 GLYMA_19G164100 GLYMA_04G066300…
	0.000970067	94	1764	1.51894	Biosynthesis of secondary metabolites	GLYMA_20G148100 GLYMA_09G255000 GLYMA_05G147000 GLYMA_07G124400 GLYMA_18G136200 GLYMA_20G169200 GLYMA_18G238100 GLYMA_06G107800 GLYMA_02G233800 GLYMA_01G097400 GLYMA_01G134600 GLYMA_03G096500 GLYMA_11G129900 GLYMA_05G022100 GLYMA_06G050100 GLYMA_13G349300 GLYMA_10G197800 GLYMA_07G236100 GLYMA_17G089600 GLYMA_12G059200 GLYMA_01G091400 GLYMA_06G302700 GLYMA_01G203400 GLYMA_11G210300 GLYMA_01G215100…
	0.00149102	8	42	5.4294	Isoflavonoid biosynthesis	GLYMA_09G048700 GLYMA_09G049100 GLYMA_09G049200 GLYMA_19G151100 GLYMA_19G151200 GLYMA_10G176500 GLYMA_10G176600 GLYMA_10G176700
	0.022823	6	37	4.62232	Zeatin biosynthesis	GLYMA_13G104700 GLYMA_17G054500 GLYMA_02G184200 GLYMA_10G107900 GLYMA_11G149100 GLYMA_17G054600
	0.0313613	7	54	3.69501	Cyanoamino acid metabolism	GLYMA_06G107800 GLYMA_11G129900 GLYMA_12G053900 GLYMA_06G043000 GLYMA_12G054200 GLYMA_01G005200 GLYMA_11G129300
	PI 88788
	Enrichment FDR	nGenes	Pathway Genes	Fold Enrichment	Pathway	Genes
	1.53501e-09	19	255	7.19322	Phenylpropanoid biosynthesis	GLYMA_20G169200 GLYMA_02G233800 GLYMA_11G064400 GLYMA_13G106400 GLYMA_19G091800 GLYMA_02G259300 GLYMA_20G001400 GLYMA_12G053900 GLYMA_03G038500 GLYMA_03G038600 GLYMA_03G038700 GLYMA_09G057100 GLYMA_11G162100 GLYMA_16G055900 GLYMA_09G022800 GLYMA_01G130500 GLYMA_01G130800 GLYMA_18G055600 GLYMA_11G129300
	5.04242e-08	16	224	6.89576	MAPK signaling pathway	GLYMA_03G162700 GLYMA_10G036700 GLYMA_13G123100 GLYMA_20G202200 GLYMA_20G203700 GLYMA_04G147000 GLYMA_19G164100 GLYMA_10G186800 GLYMA_05G119600 GLYMA_11G233300 GLYMA_17G113900 GLYMA_07G229500 GLYMA_14G124800 GLYMA_01G219100 GLYMA_14G116800 GLYMA_08G018300
	0.0036922	14	440	3.07175	Plant hormone signal transduction	GLYMA_03G162700 GLYMA_10G036700 GLYMA_13G123100 GLYMA_20G202200 GLYMA_20G203700 GLYMA_04G147000 GLYMA_07G051700 GLYMA_02G097900 GLYMA_19G164100 GLYMA_10G186800 GLYMA_05G119600 GLYMA_11G233300 GLYMA_17G113900 GLYMA_14G116800
	0.0054518	34	1764	1.86076	Biosynthesis of secondary metabolites	GLYMA_20G148100 GLYMA_20G169200 GLYMA_06G107800 GLYMA_02G233800 GLYMA_05G022100 GLYMA_06G318400 GLYMA_01G091400 GLYMA_01G215100 GLYMA_13G106400 GLYMA_11G210500 GLYMA_01G036000 GLYMA_02G130400 GLYMA_19G091800 GLYMA_02G259300 GLYMA_20G001400 GLYMA_12G053900 GLYMA_08G208300 GLYMA_01G073200 GLYMA_13G030300 GLYMA_03G038500 GLYMA_03G038600 GLYMA_05G179800 GLYMA_03G038700 GLYMA_02G029900 GLYMA_09G057100…
	0.00858828	4	42	9.19434	Isoflavonoid biosynthesis	GLYMA_09G094400 GLYMA_09G094600 GLYMA_10G176500 GLYMA_10G176700
	0.0371743	3	35	8.27491	Linoleic acid metabolism	GLYMA_13G030300 GLYMA_19G263300 GLYMA_08G189500
	0.0371743	2	11	17.5528	Glucosinolate biosynthesis	GLYMA_01G036000 GLYMA_02G029900
