# Supplementary material for: Soybean–SCN Battle: Novel Insight into Soybean’s Defense Strategies against Heterodera glycines
Source: Int J Mol Sci. 2023 Nov 12;24(22):16232. doi: 10.3390/ijms242216232 (PMC10671692; doi:10.3390/ijms242216232)
Supplement: Supplementary file 1 [file ijms-24-16232-s001.zip › Table S10.xlsx]

## Sheet: Sheet1
Table S10- The pathways analyses of DEGs in PI 437654, PI 548402, PI 88788 and Lee74 at 10 dpi
	PI437654
	Enrichment FDR	nGenes	Pathway Genes	Fold Enrichment	Pathway	Genes
	2.47814e-12	27	1764	5.90046	Biosynthesis of secondary metabolites	GLYMA_20G148100 GLYMA_20G169200 GLYMA_03G143700 GLYMA_02G233800 GLYMA_01G134600 GLYMA_01G211800 GLYMA_05G022100 GLYMA_11G070600 GLYMA_01G091400 GLYMA_11G210300 GLYMA_08G050400 GLYMA_08G277000 GLYMA_18G211000 GLYMA_12G054200 GLYMA_03G038600 GLYMA_03G038700 GLYMA_14G014700 GLYMA_09G049200 GLYMA_09G075200 GLYMA_11G162100 GLYMA_19G263300 GLYMA_20G245100 GLYMA_11G161600 GLYMA_09G277900 GLYMA_19G151100…
	1.9634e-10	7	42	64.2494	Isoflavonoid biosynthesis	GLYMA_03G143700 GLYMA_01G211800 GLYMA_11G070600 GLYMA_09G094400 GLYMA_09G049200 GLYMA_19G151100 GLYMA_19G151200
	6.49481e-10	11	255	16.6293	Phenylpropanoid biosynthesis	GLYMA_20G169200 GLYMA_02G233800 GLYMA_11G064400 GLYMA_18G211000 GLYMA_12G054200 GLYMA_03G038600 GLYMA_03G038700 GLYMA_11G162100 GLYMA_11G161600 GLYMA_09G277900 GLYMA_11G129300
	7.04404e-10	31	3159	3.78297	Metabolic pathways	GLYMA_20G148100 GLYMA_08G174900 GLYMA_20G169200 GLYMA_13G346700 GLYMA_02G233800 GLYMA_01G134600 GLYMA_01G211800 GLYMA_05G022100 GLYMA_11G070600 GLYMA_01G091400 GLYMA_11G210300 GLYMA_10G251500 GLYMA_08G118700 GLYMA_08G050400 GLYMA_05G161300 GLYMA_08G277000 GLYMA_18G211000 GLYMA_12G054200 GLYMA_03G038600 GLYMA_03G038700 GLYMA_14G014700 GLYMA_09G049200 GLYMA_09G075200 GLYMA_11G162100 GLYMA_19G263300…
	0.00395029	3	71	16.2886	Ubiquinone and other terpenoid-quinone biosynthesis	GLYMA_01G134600 GLYMA_11G210300 GLYMA_20G245100
	0.00432404	3	78	14.8268	Flavonoid biosynthesis	GLYMA_05G022100 GLYMA_01G091400 GLYMA_09G075200
	0.0137786	2	37	20.8377	Thiamine metabolism	GLYMA_10G251500 GLYMA_08G277000
	0.013827	3	130	8.89607	Glutathione metabolism	GLYMA_08G174900 GLYMA_08G118700 GLYMA_05G161300
	0.0150428	2	44	17.5226	Sulfur metabolism	GLYMA_20G148100 GLYMA_14G014700
	0.0176431	3	154	7.50967	Cysteine and methionine metabolism	GLYMA_20G148100 GLYMA_08G050400 GLYMA_14G014700
	0.0183056	2	54	14.2777	Cyanoamino acid metabolism	GLYMA_12G054200 GLYMA_11G129300
	0.028316	2	71	10.8591	Circadian rhythm	GLYMA_01G091400 GLYMA_09G075200
	0.0341057	4	391	3.9437	Biosynthesis of cofactors	GLYMA_01G134600 GLYMA_11G210300 GLYMA_10G251500 GLYMA_20G245100
	PI548402
	Enrichment FDR	nGenes	Pathway Genes	Fold Enrichment	Pathway	Genes
	0.00433532	5	255	8.98377	Phenylpropanoid biosynthesis	GLYMA_02G233800 GLYMA_03G038700 GLYMA_09G022800 GLYMA_11G129300 GLYMA_16G055900
	PI88788
	Enrichment FDR	nGenes	Pathway Genes	Fold Enrichment	Pathway	Genes
	0.0153647	2	12	25.8782	Taurine and hypotaurine metabolism	GLYMA_01G005200 GLYMA_08G091500
	3.34671e-06	6	42	22.1813	Isoflavonoid biosynthesis	GLYMA_01G211800 GLYMA_09G048900 GLYMA_09G049200 GLYMA_09G049300 GLYMA_19G151100 GLYMA_19G151200
	0.00131543	5	78	9.95317	Flavonoid biosynthesis	GLYMA_01G091400 GLYMA_05G022100 GLYMA_05G147000 GLYMA_06G202300 GLYMA_08G110500
	2.51634e-07	13	255	7.9157	Phenylpropanoid biosynthesis	GLYMA_03G038600 GLYMA_03G038700 GLYMA_05G147000 GLYMA_09G022300 GLYMA_09G022800 GLYMA_09G277900 GLYMA_09G284700 GLYMA_11G162100 GLYMA_12G054200 GLYMA_16G055900 GLYMA_18G211000 GLYMA_20G001400 GLYMA_20G169200
	0.0153647	7	286	3.8003	Plant-pathogen interaction	GLYMA_03G157800 GLYMA_04G057800 GLYMA_05G119500 GLYMA_06G187300 GLYMA_12G075100 GLYMA_15G062800 GLYMA_16G059300
	2.51634e-07	35	1828	2.97288	Biosynthesis of secondary metabolites	GLYMA_01G091400 GLYMA_01G211800 GLYMA_02G029900 GLYMA_02G184200 GLYMA_03G038600 GLYMA_03G038700 GLYMA_04G057800 GLYMA_05G022100 GLYMA_05G147000 GLYMA_06G202300 GLYMA_07G256700 GLYMA_08G091500 GLYMA_08G110500 GLYMA_08G277000 GLYMA_09G022300 GLYMA_09G022800 GLYMA_09G048900 GLYMA_09G049200 GLYMA_09G049300 GLYMA_09G277900 GLYMA_09G284700 GLYMA_10G295300 GLYMA_11G162100 GLYMA_11G210300 GLYMA_12G009200…
	Lee74
	Enrichment FDR	nGenes	Pathway Genes	Fold Enrichment	Pathway	Genes
	1.92597e-06	6	42	25.759	Isoflavonoid biosynthesis	GLYMA_01G211800 GLYMA_03G143700 GLYMA_09G048900 GLYMA_09G049200 GLYMA_11G051800 GLYMA_19G151100
	0.0186199	2	17	21.2133	Sesquiterpenoid and triterpenoid biosynthesis	GLYMA_07G187700 GLYMA_20G192700
	0.000688945	4	42	17.1727	Cutin, suberine and wax biosynthesis	GLYMA_06G167600 GLYMA_11G185000 GLYMA_12G087400 GLYMA_16G053300
	0.0306876	2	23	15.6794	Photosynthesis	GLYMA_16G145800 GLYMA_20G212900
	0.000688945	5	78	11.5585	Flavonoid biosynthesis	GLYMA_01G091400 GLYMA_02G130400 GLYMA_05G022100 GLYMA_08G312000 GLYMA_09G075200
	0.000688945	5	79	11.4122	Carbon fixation in photosynthetic organisms	GLYMA_01G010200 GLYMA_04G015900 GLYMA_09G210900 GLYMA_13G046200 GLYMA_18G030400
	0.00451868	4	71	10.1585	Circadian rhythm	GLYMA_01G091400 GLYMA_02G130400 GLYMA_09G075200 GLYMA_19G260400
	0.0186199	3	54	10.0174	Cyanoamino acid metabolism	GLYMA_07G151900 GLYMA_12G054200 GLYMA_12G054500
	0.0186199	3	57	9.49015	ABC transporters	GLYMA_09G206300 GLYMA_12G135300 GLYMA_16G172400
	5.87376e-08	13	255	9.19242	Phenylpropanoid biosynthesis	GLYMA_01G130500 GLYMA_01G169200 GLYMA_02G233800 GLYMA_02G259300 GLYMA_03G038600 GLYMA_03G038700 GLYMA_07G151900 GLYMA_08G312000 GLYMA_11G162100 GLYMA_12G054200 GLYMA_12G054500 GLYMA_12G129500 GLYMA_18G211000
	6.32041e-16	46	1828	4.53741	Biosynthesis of secondary metabolites	GLYMA_01G091400 GLYMA_01G130500 GLYMA_01G134600 GLYMA_01G169200 GLYMA_01G211800 GLYMA_02G130400 GLYMA_02G233800 GLYMA_02G259300 GLYMA_02G268000 GLYMA_02G286500 GLYMA_02G292800 GLYMA_03G038600 GLYMA_03G038700 GLYMA_03G143700 GLYMA_03G187000 GLYMA_05G022100 GLYMA_07G151900 GLYMA_08G050400 GLYMA_08G277000 GLYMA_08G312000 GLYMA_09G048900 GLYMA_09G049200 GLYMA_09G075200 GLYMA_09G122500 GLYMA_10G097800…
	0.0455483	5	242	3.72547	Starch and sucrose metabolism	GLYMA_07G151900 GLYMA_12G054200 GLYMA_12G054500 GLYMA_17G138500 GLYMA_20G026700
